# Supplementary material for: Congenital disorder of glycosylation caused by starting site-specific variant in syntaxin-5
Source: PubMed Central journal article supplement (PMC8553859; doi:10.1038/s41467-021-26534-y), 2021-10-28
Supplement: 41467_2021_26534_MOESM3_ESM.pdf [file 41467_2021_26534_MOESM3_ESM.pdf]

## Description of additional supplementary files

Title: Supplementary Data 1.

Description: Microarray data.

Title: Supplementary Movie 1.

Description: Epifluorescence time-lapse imaging of RUSH cargo ManII-SBP-EGFP (green) trafficking in wildtype HeLa after biotin addition. Magenta: Giantin-mScarlet.

Title: Supplementary Movie 2.

Description: Epifluorescence time-lapse imaging of RUSH cargo ManII-SBP-EGFP (green) trafficking in HeLa Stx5 $\Delta$ L HeLa after biotin addition. Magenta: Giantin-mScarlet.

Title: Supplementary Movie 3.

Description: Epifluorescence time-lapse imaging of RUSH cargo VSVG-ts045-EGFP (green) trafficking in wildtype HeLa after biotin addition. Magenta: Giantin-mScarlet.

Title: Supplementary Movie 4.

Description: Epifluorescence time-lapse imaging of RUSH cargo VSVG-ts045-EGFP (green) trafficking in Stx5 $\Delta$ L HeLa after biotin addition. Magenta: Giantin-mScarlet.

Title: Supplementary Movie 5.

Description: Epifluorescence time-lapse imaging of RUSH cargo Stx5S-SBP-mCitrine (green) trafficking in wildtype HeLa after biotin addition. Magenta: Giantin-mScarlet.

Title: Supplementary Movie 6.

Description: Epifluorescence time-lapse imaging of RUSH cargo Stx5L-SBP-mCitrine (green) trafficking in wildtype HeLa after biotin addition. Magenta: Giantin-mScarlet.

Title: Supplementary Movie 7.

Description: Epifluorescence time-lapse imaging of RUSH cargo Stx5L $\Delta$ ER-SBP-mCitrine (green) trafficking in wildtype HeLa after biotin addition. Magenta: Giantin-mScarlet.
